# Supplementary material
Source: PubMed Central journal article supplement (PMC5953764)
Supplement: NIHMS902006-supplement-Sup_info.pdf [file NIHMS902006-supplement-Sup_info.pdf]

## Supplementary table 1

| Intruder<br>Resident | Adult♂                                  | Juvenile♂                               | Adult♀                               |
|----------------------|-----------------------------------------|-----------------------------------------|--------------------------------------|
| Virgin♀(SW)          | Mate                                    | Attack 78.9% (30/38)<br>Mount 0% (0/38) | Attack 60% (6/10)<br>Mount 0% (0/10) |
| Virgin♀(C57)         | Mate                                    | Attack 0% (0/10)<br>Mount 30% (3/10)    | Attack 0% (0/10)<br>Mount 60% (6/10) |
| Lactating♀(SW)       | Attack 88.5% (23/26)<br>Mount 0% (0/26) | Attack 94.1% (16/17)<br>Mount 0% (0/17) | Attack 80% (8/10)<br>Mount 0% (0/10) |
| Lactating♀(C57)      | Attack 42.1% (8/19)<br>Mount 0% (0/19)  | Attack 68.4 (13/19)<br>Mount 0% (0/19)  | Attack 44.4% (4/9)<br>Mount 0% (0/9) |

**Supplementary Table 1, Related to Figure 1.** Probability of attack or mount when a female mouse encounters an adult male, a juvenile male or an adult female intruder in her home cage. All test females are singly housed for at least one week. All intruders are C57BL/6N background.

# Supplementary Table 2

| TEST USED      |                                    | n                     |                     |                                 | DESCRIPTIVE STATS (AVERAGE, VARIANCE) |                             | P VALUE               |                                                                      | DEGREES OF FREEDOM & F/t/z/R/ETC VALUE |                                                                                           |                       |
|----------------|------------------------------------|-----------------------|---------------------|---------------------------------|---------------------------------------|-----------------------------|-----------------------|----------------------------------------------------------------------|----------------------------------------|-------------------------------------------------------------------------------------------|-----------------------|
| FIGURE NUMBER  | WHICH TEST?                        | SECTION & PARAGRAPH # | EXACT VALUE         | DEFINED?                        | SECTION & PARAGRAPH #                 | REPORTED?                   | SECTION & PARAGRAPH # | EXACT VALUE                                                          | SECTION & PARAGRAPH #                  | VALUE                                                                                     | SECTION & PARAGRAPH # |
| 1a middle      | Unpaired t-test                    | Fig. legend           | 5, 6                | virgin female mice              | Fig and Fig. legend                   | error bars are mean +/- SEM | Fig. legend           | p = 0.0003                                                           | Fig and Fig. legend                    | t(9)=5.5717                                                                               | n/a                   |
| 1a right       | Paired t-test                      | Fig. legend           | 6                   | virgin female mice              | Fig and Fig. legend                   | error bars are mean +/- SEM | Fig. legend           | p = 0.0014                                                           | Fig and Fig. legend                    | t(5)=6.3436                                                                               | n/a                   |
| 1b middle      | Unpaired t-test                    | Fig. legend           | 3, 5                | lactating female mice           | Fig and Fig. legend                   | error bars are mean +/- SEM | Fig. legend           | p = 0.0034                                                           | Fig and Fig. legend                    | t(6)=4.6890                                                                               | n/a                   |
| 1b right       | Paired t-test                      | Fig. legend           | 5                   | lactating female mice           | Fig and Fig. legend                   | error bars are mean +/- SEM | Fig. legend           | p = 0.0428                                                           | Fig and Fig. legend                    | t(4)=2.9298                                                                               | n/a                   |
| 1c middle      | Unpaired t-test                    | Fig. legend           | 3, 4                | lactating female mice           | Fig and Fig. legend                   | error bars are mean +/- SEM | Fig. legend           | p = 0.0037                                                           | Fig and Fig. legend                    | t(5)=5.1078                                                                               | n/a                   |
| 1c right       | Paired t-test                      | Fig. legend           | 4                   | lactating female mice           | Fig and Fig. legend                   | error bars are mean +/- SEM | Fig. legend           | p = 0.0078                                                           | Fig and Fig. legend                    | t(3)=6.3687                                                                               | n/a                   |
| 1d middle      | Unpaired t-test                    | Fig. legend           | 5, 3                | virgin female mice              | Fig and Fig. legend                   | error bars are mean +/- SEM | Fig. legend           | p = 0.0006                                                           | Fig and Fig. legend                    | t(6)=6.5737                                                                               | n/a                   |
| 1d right       | Paired t-test                      | Fig. legend           | 3                   | virgin female mice              | Fig and Fig. legend                   | error bars are mean +/- SEM | Fig. legend           | p = 0.0007                                                           | Fig and Fig. legend                    | t(2)=38.5744                                                                              | n/a                   |
| 2d right       | Pearson product-moment correlation | Fig. legend           | n=731               | seconds                         | Fig and Fig. legend                   | individual data plots       | Fig. legend           | p = 0.0859                                                           | Fig and Fig. legend                    | R = 0.0636                                                                                | Fig.                  |
| 2j             | Paired t-test                      | Fig. legend           | 12, 12, 11, 12, 5   | virgin female mice              | Fig and Fig. legend                   | error bars are mean +/- SEM | Fig. legend           | p=0.4881, p=0.00032, p=0.000077, p=0.000031, p=0.0036                | Fig and Fig. legend                    | t(11)=0.7174, t(11)=5.1444, t(10)=6.4108, t(11)=6.7634, t(4)=6.1375                       | n/a                   |
| 2k             | Paired t-test                      | Fig. legend           | 6, 6, 6, 6, 6, 5, 6 | lactating female mice           | Fig and Fig. legend                   | error bars are mean +/- SEM | Fig. legend           | p=0.3771, p=0.0185, p=0.0178, p=0.0014, p=0.0019, p=0.5860, p=0.1310 | Fig and Fig. legend                    | t(5)=0.9688, t(5)=3.4375, t(5)=3.4708, t(5)=6.3677, t(5)=5.9439, t(4)=0.5915, t(5)=1.8048 | n/a                   |
| 2l             | Paired t-test                      | Fig. legend           | 6                   | lactating female mice           | Fig and Fig. legend                   | error bars are mean +/- SEM | Fig. legend           | p=0.0245                                                             | Fig and Fig. legend                    | t(5)=3.1816                                                                               | n/a                   |
| 2m             | Paired t-test                      | Fig. legend           | 11, 6, 6            | virgin or lactating female mice | Fig and Fig. legend                   | error bars are mean +/- SEM | Fig. legend           | p=0.0212, p=0.0077, p=0.0054                                         | Fig and Fig. legend                    | t(10)=2.7309, t(5)=4.3084, t(5)=4.6828                                                    | n/a                   |
| 2n             | Paired t-test                      | Fig. legend           | 5                   | virgin female mice              | Fig and Fig. legend                   | error bars are mean +/- SEM | Fig. legend           | p=0.0440                                                             | Fig and Fig. legend                    | t(4)=2.9020                                                                               | n/a                   |
| result, para 4 | Paired t-test                      | result, para4         | 6                   | lactating female mice           | result, para4                         | error bars are mean +/- SEM | result, para4         | p=0.040                                                              | result, para4                          | t(5)=2.7613                                                                               | n/a                   |

|                |                                          |               |        |                                          |                     |                             |                     |                                                                                                          |                     |                                                                                                                        |      |
|----------------|------------------------------------------|---------------|--------|------------------------------------------|---------------------|-----------------------------|---------------------|----------------------------------------------------------------------------------------------------------|---------------------|------------------------------------------------------------------------------------------------------------------------|------|
| result, para 4 | Paired t-test                            | result, para4 | 6      | lactating female mice                    | result, para4       | error bars are mean +/- SEM | result, para4       | p=0.88                                                                                                   | result, para4       | t(5)=0.1626                                                                                                            | n/a  |
| 3e             | Two-way repeated measure ANOVA           | Fig. legend   | 13, 10 | lactating female mice, hM4Di and control | Fig and Fig. legend | error bars are mean +/- SEM | Fig. legend         | at different time points, p = 0.0016; between groups, p = 0.0389; and interaction, p = 0.0156.           | n/a                 | at different time points, F(5,105) = 4.2; between groups, F(1,21) = 4.85; and interaction F(5,105) = 2.95.             | n/a  |
| 3e             | Holm-Sidak post-hoc multiple comparisons | Fig. legend   | 13, 10 | lactating female mice, hM4Di and control | Fig and Fig. legend | error bars are mean +/- SEM | Fig. legend         | p value on Postpartum Day 2: 1; Day 3: 0.0046; Day 4: 1; Day 5: 0.0357; Day 6: 0.9215 and Day 7: 0.0530. | Fig and Fig. legend | n/a                                                                                                                    | n/a  |
| 3f left        | Paired t-test                            | Fig. legend   | 13     | lactating female mice, hM4Di             | Fig and Fig. legend | error bars are mean +/- SEM | Fig. legend         | p = 1.08 x 10 <sup>-4</sup>                                                                              | Fig and Fig. legend | t(12)=5.6484                                                                                                           | n/a  |
| 3f right       | Paired t-test                            | Fig. legend   | 10     | lactating female mice, control           | Fig and Fig. legend | error bars are mean +/- SEM | Fig. legend         | p = 0.7507                                                                                               | Fig and Fig. legend | t(9)=0.3277                                                                                                            | n/a  |
| 3g left        | Paired t-test                            | Fig. legend   | 11     | lactating female mice, hM4Di             | Fig and Fig. legend | error bars are mean +/- SEM | Fig. legend         | p=0.0306                                                                                                 | Fig and Fig. legend | t(10)=2.5161                                                                                                           | n/a  |
| 3g right       | Paired t-test                            | Fig. legend   | 5      | lactating female mice, control           | Fig and Fig. legend | error bars are mean +/- SEM | Fig. legend         | p = 0.7596                                                                                               | Fig and Fig. legend | t(4)=0.3277                                                                                                            | n/a  |
| 3h             | Two-way repeated measure ANOVA           | Fig. legend   | 13, 10 | lactating female mice, hM4Di and control | Fig and Fig. legend | error bars are mean +/- SEM | Fig. legend         | at different time points, p = 0.0006; between groups, P=0.4782 ; and interaction, P=0.9904.              | n/a                 | at different time points, F (5, 105) = 4.741 ; between groups, F (1, 21) = 0.5214; and interaction F (5, 105) = 0.1078 | n/a  |
| 3i             | Paired t-test                            | Fig. legend   | 13     | lactating female mice, hM4Di             | Fig and Fig. legend | error bars are mean +/- SEM | Fig. legend         | p = 0.6674                                                                                               | Fig and Fig. legend | t(12)=0.4405                                                                                                           | n/a  |
| 3j             | Paired t-test                            | Fig. legend   | 13     | lactating female mice, hM4Di             | Fig and Fig. legend | error bars are mean +/- SEM | Fig. legend         | p = 0.4747                                                                                               | Fig and Fig. legend | t(12)=0.7380                                                                                                           | n/a  |
| 3k             | Pearson product-moment correlation       | Fig. legend   | 12     | lactating female mice, hM4Di             | Fig and Fig. legend | individual data plots       | Fig. legend         | p=0.0081                                                                                                 | Fig and Fig. legend | R=-0.72                                                                                                                | Fig. |
| 4g             | Paired t-test                            | Fig. legend   | 12     | virgin female mice, Chr2                 | Fig and Fig. legend | error bars are mean +/- SEM | Fig and Fig. legend | p = 2.27 x 10 <sup>-4</sup> , p=9.86x 10 <sup>-4</sup>                                                   | Fig and Fig. legend | t(11)=5.3688, t(11)= 4.4453                                                                                            | n/a  |
| 4 h            | Paired t-test                            | Fig. legend   | 12     | virgin female mice, Chr2                 | Fig and Fig. legend | error bars are mean +/- SEM | Fig and Fig. legend | p=0.0492, p=0.0128                                                                                       | Fig and Fig. legend | t(11)=2.2097, t(11)=2.9666                                                                                             | n/a  |

|          |                                          |             |                                                                                      |                             |                     |                             |                     |                                                                                                                                                                                                                                                                                   |                     |                                                                                                                      |     |
|----------|------------------------------------------|-------------|--------------------------------------------------------------------------------------|-----------------------------|---------------------|-----------------------------|---------------------|-----------------------------------------------------------------------------------------------------------------------------------------------------------------------------------------------------------------------------------------------------------------------------------|---------------------|----------------------------------------------------------------------------------------------------------------------|-----|
| 4 i      | Two-way repeated measure ANOVA           | Fig. legend | adult male intruder, 8 stimulation sites; adult female intruder, 6 stimulation sites | virgin female mice, Chr2    | Fig and Fig. legend | error bars are mean +/- SEM | Fig and Fig. legend | behavior: $p = 4.66 \times 10^{-6}$ ; between intruder types: $p = 0.97$ ; the interaction term: $p = 0.73$ .                                                                                                                                                                     | n/a                 | behavior: $F(1,12) = 61.37$ ; between intruder types: $F(1, 12) = 0.0010$ ; the interaction term: $F(1,12) = 0.12$ . | n/a |
| 4 i      | Holm-Sidak post-hoc multiple comparisons | Fig. legend | adult male intruder, 8 stimulation sites; adult female intruder, 6 stimulation sites | virgin female mice, Chr2    | Fig and Fig. legend | error bars are mean +/- SEM | Fig and Fig. legend | p values for male intruder: 0.0023; female intruder: 0.0055.                                                                                                                                                                                                                      | Fig and Fig. legend | n/a                                                                                                                  | n/a |
| 4j left  | Paired t-test                            | Fig. legend | 12                                                                                   | virgin female mice, control | Fig and Fig. legend | error bars are mean +/- SEM | Fig and Fig. legend | $p = 0.7363$                                                                                                                                                                                                                                                                      | Fig and Fig. legend | $t(11)=0.3454$                                                                                                       | n/a |
| 4j right | Paired t-test                            | Fig. legend | 12                                                                                   | virgin female mice, control | Fig and Fig. legend | error bars are mean +/- SEM | Fig and Fig. legend | $p = 0.5863$                                                                                                                                                                                                                                                                      | Fig and Fig. legend | $t(11)=0.5606$                                                                                                       | n/a |
| 5c       | One-way repeated measure ANOVA           | Fig. legend | 18                                                                                   | single untis                | Fig and Fig. legend | error bars are mean +/- SEM | Fig and Fig. legend | $p = 9.51 \times 10^{-11}$                                                                                                                                                                                                                                                        | n/a                 | $F(3, 51) = 27.61$                                                                                                   | n/a |
| 5c       | Holm-Sidak post-hoc multiple comparisons | Fig. legend | 18                                                                                   | single untis                | Fig and Fig. legend | error bars are mean +/- SEM | Fig and Fig. legend | p values for baseline vs. no contact: $4.51 \times 10^{-4}$ ; baseline vs. investigate: $3.73 \times 10^{-4}$ ; baseline vs. attack: $6.24 \times 10^{-5}$ ; no contact vs. investigate: 0.00339; no contact vs. attack: $2.59 \times 10^{-4}$ ; investigate vs. attack: 0.00139. | Fig and Fig. legend | n/a                                                                                                                  | n/a |
| 5f       | One-way repeated measure ANOVA           | Fig. legend | 9                                                                                    | single untis                | Fig and Fig. legend | error bars are mean +/- SEM | Fig and Fig. legend | $p = 3.38 \times 10^{-5}$                                                                                                                                                                                                                                                         | n/a                 | $F(3, 24) = 12.804$                                                                                                  | n/a |

|    |                                          |             |             |                                            |                     |                             |                     |                                                                                                                                                                                                                                                                                                                         |                     |                   |      |
|----|------------------------------------------|-------------|-------------|--------------------------------------------|---------------------|-----------------------------|---------------------|-------------------------------------------------------------------------------------------------------------------------------------------------------------------------------------------------------------------------------------------------------------------------------------------------------------------------|---------------------|-------------------|------|
| 5f | Holm-Sidak post-hoc multiple comparisons | Fig. legend | 9           | single untis                               | Fig and Fig. legend | error bars are mean +/- SEM | Fig and Fig. legend | p values for baseline vs. no contact: 0.0146; baseline vs. investigation: 0.0140; baseline vs. mounted: 0.0168; no contact vs. investigation: 0.0363; no contact vs. mounted: 0.0466; investigation vs. mounted: 0.0677.                                                                                                | Fig and Fig. legend | n/a               | n/a  |
| 5g | Pearson product-moment correlation       | Fig. legend | 21          | single untis                               | Fig and Fig. legend | individual data plots       | Fig and Fig. legend | p=0.95                                                                                                                                                                                                                                                                                                                  | Fig and Fig. legend | R=-0.016          | Fig. |
| 5h | Pearson product-moment correlation       | Fig. legend | 103         | single untis                               | Fig and Fig. legend | individual data plots       | Fig and Fig. legend | p=0.85                                                                                                                                                                                                                                                                                                                  | Fig and Fig. legend | R=-0.02           | Fig. |
| 5i | Pearson product-moment correlation       | Fig. legend | 5           | 5 virgin female mice                       | Fig and Fig. legend | individual data plots       | Fig and Fig. legend | p=0.013                                                                                                                                                                                                                                                                                                                 | Fig and Fig. legend | R=0.95            | Fig. |
| 6b | One-way ANOVA                            | Fig. legend | 4 mice each | virgin and lactating female mice           | Fig and Fig. legend | error bars are mean +/- SEM | Fig and Fig. legend | p = 2.58 x 10 <sup>-6</sup>                                                                                                                                                                                                                                                                                             | n/a                 | F (4, 15) = 23.51 | n/a  |
| 6b | Tukey's multiple comparisons             | Fig. legend | 4 mice each | virgin and lactating female mice           | Fig and Fig. legend | error bars are mean +/- SEM | Fig and Fig. legend | p values at for F-F (Virgin) vs. M-M: 0.4691; F-F (Virgin) vs. F-M: <0.0001; F-F (Virgin) vs. M-F: <0.0001; F-F (Virgin) vs. F-F (Lactation): 0.3091; M-M vs. F-M: 0.0006; M-M vs. M-F: 0.0002; M-M vs. F-F (Lactation): 0.9975; F-M vs. M-F: 0.9848; F-M vs. F-F (Lactation): 0.0011; M-F vs. F-F (Lactation): 0.0004. | Fig and Fig. legend | n/a               | n/a  |
| 7e | Paired t-test                            | Fig. legend | 4           | virgin SW female mice; object              | Fig and Fig. legend | error bars are mean +/- SEM | Fig and Fig. legend | p =0.1455                                                                                                                                                                                                                                                                                                               | Fig and Fig. legend | t(3)=1.9552       | n/a  |
| 7e | Paired t-test                            | Fig. legend | 6           | virgin SW female mice; adult male intruder | Fig and Fig. legend | error bars are mean +/- SEM | Fig and Fig. legend | p=0.0052                                                                                                                                                                                                                                                                                                                | Fig and Fig. legend | t(5)=4.7386       | n/a  |

|                 |                              |                |         |                                                   |                     |                             |                     |                                                                                      |                     |                |     |
|-----------------|------------------------------|----------------|---------|---------------------------------------------------|---------------------|-----------------------------|---------------------|--------------------------------------------------------------------------------------|---------------------|----------------|-----|
| 7e              | Paired t-test                | Fig. legend    | 4       | virgin C57BL/6 female mice; adult male intruder   | Fig and Fig. legend | error bars are mean +/- SEM | Fig and Fig. legend | $p=1.78 \times 10^{-4}$                                                              | Fig and Fig. legend | $t(3)=23.0683$ | n/a |
| 7e              | Paired t-test                | Fig. legend    | 6       | virgin SW female mice; juvenile male intruder     | Fig and Fig. legend | error bars are mean +/- SEM | Fig and Fig. legend | $p=0.0086$                                                                           | Fig and Fig. legend | $t(5)=4.1816$  | n/a |
| 7e              | Paired t-test                | Fig. legend    | 4       | virgin SW female mice; adult female intruder      | Fig and Fig. legend | error bars are mean +/- SEM | Fig and Fig. legend | $p=0.0316$                                                                           | Fig and Fig. legend | $t(3)=3.8170$  | n/a |
| 7e              | Paired t-test                | Fig. legend    | 5       | Lactating SW female mice; juvenile male intruder  | Fig and Fig. legend | error bars are mean +/- SEM | Fig and Fig. legend | $p=0.0224$                                                                           | Fig and Fig. legend | $t(4)=3.6192$  | n/a |
| 7e              | Paired t-test                | Fig. legend    | 5       | Lactating SW female mice; adult female intruder   | Fig and Fig. legend | error bars are mean +/- SEM | Fig and Fig. legend | $p=0.0211$                                                                           | Fig and Fig. legend | $t(4)=3.6846$  | n/a |
| 7e              | Paired t-test                | Fig. legend    | 7       | Lactating SW female mice; adult male intruder     | Fig and Fig. legend | error bars are mean +/- SEM | Fig and Fig. legend | $p=3.70 \times 10^{-4}$                                                              | Fig and Fig. legend | $t(6)=7.1758$  | n/a |
| 7e              | Paired t-test                | Fig. legend    | 3       | Lactating C57 female mice; juvenile male intruder | Fig and Fig. legend | error bars are mean +/- SEM | Fig and Fig. legend | $p=0.0280$                                                                           | Fig and Fig. legend | $t(2)=5.8542$  | n/a |
| result, para 16 | Paired t-test                | result, para17 | 6       | virgin female mice                                | result, para17      | error bars are mean +/- SEM | result, para17      | $p=0.0125$                                                                           | result, para17      | $t(5)=3.8129$  | n/a |
| result, para 16 | Paired t-test                | result, para17 | 4       | virgin female mice                                | result, para17      | error bars are mean +/- SEM | result, para17      | $p=0.037$                                                                            | result, para17      | $t(3)=3.6096$  | n/a |
| 8f left         | Paired t-test                | Fig. legend    | 3       | virgin female mice                                | Fig and Fig. legend | error bars are mean +/- SEM | Fig and Fig. legend | $p=0.0167$                                                                           | Fig and Fig. legend | $t(2)=7.6501$  | n/a |
| 8f right        | Paired t-test                | Fig. legend    | 3       | virgin female mice                                | Fig and Fig. legend | error bars are mean +/- SEM | Fig and Fig. legend | $p=0.7544$                                                                           | Fig and Fig. legend | $t(2)=0.3584$  | n/a |
| 8j left         | One-way ANOVA                | Fig. legend    | 3, 5, 4 | virgin female mice                                | Fig and Fig. legend | error bars are mean +/- SEM | Fig and Fig. legend | $F(2, 9) = 84.93$                                                                    | Fig and Fig. legend | $P<0.0001$     | n/a |
| 8j left         | Tukey's multiple comparisons | Fig. legend    | 3, 5, 4 | virgin female mice                                | Fig and Fig. legend | error bars are mean +/- SEM | Fig and Fig. legend | object vs fight: $p=0.2732$ ; object vs mate: $p<0.0001$ ; fight vs mate: $p<0.0001$ | Fig and Fig. legend | n/a            | n/a |
| 8j right        | One-way ANOVA                | Fig. legend    | 5, 5, 4 | virgin female mice                                | Fig and Fig. legend | error bars are mean +/- SEM | Fig and Fig. legend | $F(2, 11) = 29.93$                                                                   | Fig and Fig. legend | $P<0.0001$     | n/a |
| 8j right        | Tukey's multiple comparisons | Fig. legend    | 5, 5, 4 | virgin female mice                                | Fig and Fig. legend | error bars are mean +/- SEM | Fig and Fig. legend | object vs fight: $p=0.0004$ ; object vs mate: $p<0.0001$ ; fight vs mate: $p=0.1830$ | Fig and Fig. legend | n/a            | n/a |

|            |                                          |             |               |                                          |                     |                             |                     |                                                                                                                                                                                                                                                                                                                                                             |                     |                                                                                                           |     |
|------------|------------------------------------------|-------------|---------------|------------------------------------------|---------------------|-----------------------------|---------------------|-------------------------------------------------------------------------------------------------------------------------------------------------------------------------------------------------------------------------------------------------------------------------------------------------------------------------------------------------------------|---------------------|-----------------------------------------------------------------------------------------------------------|-----|
| s1b left   | One-way ANOVA                            | Fig. legend | 4, 6, 4       | virgin SW female mice                    | Fig and Fig. legend | error bars are mean +/- SEM | Fig and Fig. legend | F (2, 11) = 7.736                                                                                                                                                                                                                                                                                                                                           | Fig and Fig. legend | P=0.0080                                                                                                  | n/a |
| s1b left   | Tukey's multiple comparisons             | Fig. legend | 4, 6, 4       | virgin SW female mice                    | Fig and Fig. legend | error bars are mean +/- SEM | Fig and Fig. legend | object vs juvenile :p=0.0080; object vs adult female:p=0.0302; juvenile vs adult female:p=0.8770                                                                                                                                                                                                                                                            | Fig and Fig. legend | n/a                                                                                                       | n/a |
| s1b middle | One-way ANOVA                            | Fig. legend | 3, 5, 5, 3, 7 | Lactating SW female mice                 | Fig and Fig. legend | error bars are mean +/- SEM | Fig and Fig. legend | F (4, 18) = 15.07                                                                                                                                                                                                                                                                                                                                           | Fig and Fig. legend | P<0.0001                                                                                                  | n/a |
| s1b middle | Tukey's multiple comparisons             | Fig. legend | 3, 5, 5, 3, 7 | Lactating SW female mice                 | Fig and Fig. legend | error bars are mean +/- SEM | Fig and Fig. legend | object vs juvenile:p=0.0018; object vs adult female:p=0.0184; object vs adult male(inves):p=0.6409; object vs adult male:p<0.0001; juv vs adult female:p=0.7093; juv vs adult male (inves):p=0.0462; juv vs adult male:p=0.1724; adult female vs adult male(inves):p=0.3235; adult female vs adult male:p=0.0116; adult male (inves) vs adult male:p=0.0005 | Fig and Fig. legend | n/a                                                                                                       | n/a |
| s1b right  | Unpaired t-test                          | Fig. legend | 3, 3          | Lactating C57 female mice                | Fig and Fig. legend | error bars are mean +/- SEM | Fig and Fig. legend | p=0.0023                                                                                                                                                                                                                                                                                                                                                    | Fig and Fig. legend | t(4)=6.8818                                                                                               | n/a |
| s2f        | Two-way repeated measure ANOVA           | Fig. legend | 8 each        | lactating female mice, hM4Di and control | Fig and Fig. legend | error bars are mean +/- SEM | Fig and Fig. legend | at different time points, p = 0.0003; between groups, p = 0.0258; and interaction, p = 0.0291.                                                                                                                                                                                                                                                              | n/a                 | at different time points, F(5,70) = 5.33; between groups, F(1,14) = 6.22; and interaction F(5,70) = 2.66. | n/a |
| s2f        | Holm-Sidak post-hoc multiple comparisons | Fig. legend | 8 each        | lactating female mice, hM4Di and control | Fig and Fig. legend | error bars are mean +/- SEM | Fig and Fig. legend | p value on Postpartum Day 2: 0.4186; Day 3: 0.0078; Day 4: 0.9998; Day 5: 0.0252; Day 6: 1 and Day 7: 0.9349.                                                                                                                                                                                                                                               | Fig and Fig. legend | n/a                                                                                                       | n/a |

|           |                                    |             |               |                                                  |                     |                             |                     |                                                                                                                                                    |                     |                                                                                                                                                                    |      |
|-----------|------------------------------------|-------------|---------------|--------------------------------------------------|---------------------|-----------------------------|---------------------|----------------------------------------------------------------------------------------------------------------------------------------------------|---------------------|--------------------------------------------------------------------------------------------------------------------------------------------------------------------|------|
| s2g       | Paired t-test                      | Fig. legend | 8 each        | lactating female mice, hM4Di and control         | Fig and Fig. legend | error bars are mean +/- SEM | Fig and Fig. legend | hM4Di: p = 0.0030; control: p=0.5504                                                                                                               | Fig and Fig. legend | hM4Di: t(7)=4.4557; control:t(7)=0.6272                                                                                                                            | n/a  |
| s2h       | Paired t-test                      | Fig. legend | 8 each        | lactating female mice, hM4Di and control         | Fig and Fig. legend | error bars are mean +/- SEM | Fig and Fig. legend | hM4Di: p = 0.8241; control: p=0.5125                                                                                                               | Fig and Fig. legend | hM4Di:t(7)=0.2307; control:t(7)=0.6898                                                                                                                             |      |
| s2i       | Two-way repeated measure ANOVA     | Fig. legend | 8 each        | lactating female mice, hM4Di and control         | Fig and Fig. legend | error bars are mean +/- SEM | Fig and Fig. legend | at different time points, p = 0.9739; between groups, p = 0.4197; and interaction, p = 0.8857.                                                     | n/a                 | at different time points, F(5,70) = 0.17; between groups, F(1,14) = 0.69; and interaction F(5,70) = 0.34.                                                          | n/a  |
| s2j       | Paired t-test                      | Fig. legend | 8             | lactating female mice, hM4Di                     | Fig and Fig. legend | error bars are mean +/- SEM | Fig and Fig. legend | p = 0.3964                                                                                                                                         | Fig and Fig. legend | t(7)=0.9032                                                                                                                                                        | n/a  |
| s2k       | Pearson product-moment correlation | Fig. legend | 9 each        | lactating female mice, hM4Di                     | Fig and Fig. legend | individual data plots       | Fig and Fig. legend | anterior VMhvl: p=0.76; posterior VMHvl: p=0.0071; Arc:p=0.61                                                                                      | Fig and Fig. legend | anterior VMhvl: R=-0.12; posterior VMHvl: R=-0.82; Arc:R=0.20                                                                                                      | Fig. |
| s3c       | Paired t-test                      | Fig. legend | 6             | Virgin female mice GCamp                         | Fig and Fig. legend | error bars are mean +/- SEM | Fig and Fig. legend | p=0.6319                                                                                                                                           | Fig and Fig. legend | t(5)=0.5097                                                                                                                                                        | n/a  |
| s3f       | Paired t-test                      | Fig. legend | 4             | lactating female mice GCamp                      | Fig and Fig. legend | error bars are mean +/- SEM | Fig and Fig. legend | p= 0.0416                                                                                                                                          | Fig and Fig. legend | t(3)=3.4278                                                                                                                                                        | n/a  |
| s4b       | Paired t-test                      | Fig. legend | 4 each        | Virgin or lactating C57BL/6 female mice GCamp    | Fig and Fig. legend | error bars are mean +/- SEM | Fig and Fig. legend | p=0.0786<br>p=4.89x 10 <sup>-4</sup><br>p=0.0461<br>p=0.0446<br>p=0.0367<br>p=0.0301                                                               | Fig and Fig. legend | t(3)=2.6254<br>t(3)=16.4530<br>t(3)=3.2893<br>t(3)=3.3337<br>t(3)=3.6019<br>t(3)=3.8935                                                                            | n/a  |
| s5f       | Paired t-test                      | Fig. legend | 13, 12, 14, 4 | YFP and mcherry signals during various behaviors | Fig and Fig. legend | error bars are mean +/- SEM | Fig and Fig. legend | p values for investigation on juvenile: p=0.5252; attack juvenile:p=0.8119; investigation on adult male: p=0.5970; mounted by adult male: p=0.8845 | Fig and Fig. legend | t values for investigation on juvenile: t(12)=0.6544;att ack juvenile: t(11)=0.2437; investigation on adult male: t(13)=0.5419; mounted by adult male: t(3)=0.1580 | n/a  |
| s6d left  | Paired t-test                      | Fig. legend | 8, 6          | virgin female mice, hM4Di and control            | Fig and Fig. legend | error bars are mean +/- SEM | Fig and Fig. legend | hM4Di: p = 0.0039; control: p=0.8404                                                                                                               | Fig and Fig. legend | hM4Di: t(7)=4.2285; control: t(5)=0.2122                                                                                                                           | n/a  |
| s6d right | Paired t-test                      | Fig. legend | 8, 6          | virgin female mice, hM4Di and control            | Fig and Fig. legend | error bars are mean +/- SEM | Fig and Fig. legend | hM4Di: p = 0.0033; control: p=0.3993                                                                                                               | Fig and Fig. legend | hM4Di: t(7)=4.3610; control: t(5)=0.9210                                                                                                                           | n/a  |
| s6e       | Paired t-test                      | Fig. legend | 8, 6          | virgin female mice, hM4Di and control            | Fig and Fig. legend | error bars are mean +/- SEM | Fig and Fig. legend | hM4Di: p = 0.6921; control:p=0.8621                                                                                                                | Fig and Fig. legend | hM4Di: t(7)=0.4128; control: t(5)=0.1828                                                                                                                           | n/a  |



|           |                                |             |         |                                     |                     |                             |                     |                                                                                                          |                     |                                |     |
|-----------|--------------------------------|-------------|---------|-------------------------------------|---------------------|-----------------------------|---------------------|----------------------------------------------------------------------------------------------------------|---------------------|--------------------------------|-----|
| s6i left  | Paired t-test                  | Fig. legend | 5       | Lactating female mice, hM4Di        | Fig and Fig. legend | error bars are mean +/- SEM | Fig and Fig. legend | $p = 0.0431$                                                                                             | Fig and Fig. legend | $t(4)=2.9240$                  | n/a |
| s6i right | Paired t-test                  | Fig. legend | 5       | Lactating female mice, hM4Di        | Fig and Fig. legend | error bars are mean +/- SEM | Fig and Fig. legend | $p = 0.0297$                                                                                             | Fig and Fig. legend | $t(4)=186.3783$                | n/a |
| s6j left  | Paired t-test                  | Fig. legend | 5       | Lactating female mice, hM4Di        | Fig and Fig. legend | error bars are mean +/- SEM | Fig and Fig. legend | $p = 0.7879$                                                                                             | Fig and Fig. legend | $t(4)=0.2877$                  | n/a |
| s6j right | Paired t-test                  | Fig. legend | 4       | Lactating female mice, hM4Di        | Fig and Fig. legend | error bars are mean +/- SEM | Fig and Fig. legend | $p = 0.7246$                                                                                             | Fig and Fig. legend | $t(3)=0.3869$                  | n/a |
| s8e left  | Paired t-test                  | Fig. legend | 10      | virgin female mice, Chr2            | Fig and Fig. legend | error bars are mean +/- SEM | Fig and Fig. legend | $p=3.44 \times 10^{-4}$<br>$p=6.56 \times 10^{-4}$                                                       | Fig and Fig. legend | $t(9)=5.5768$<br>$t(9)=5.0874$ | n/a |
| s8e right | Paired t-test                  | Fig. legend | 10      | virgin female mice, Chr2            | Fig and Fig. legend | error bars are mean +/- SEM | Fig and Fig. legend | $p=0.0631$<br>$p=0.0202$                                                                                 | Fig and Fig. legend | $t(9)=2.1198$<br>$t(9)=2.8163$ | n/a |
| s8f       | One-way ANOVA                  | Fig. legend | 5, 4, 6 | virgin female mice                  | Fig and Fig. legend | error bars are mean +/- SEM | Fig and Fig. legend | $F(2, 12) = 5.825$                                                                                       | n/a                 | $P=0.0171$                     | n/a |
| s8f       | Tukey's multiple comparisons   | Fig. legend | 5, 4, 6 | virgin female mice                  | Fig and Fig. legend | error bars are mean +/- SEM | Fig and Fig. legend | object vs investigate: $p=0.3626$ ;<br>object vs mount: $p=0.0135$ ;<br>investigate vs mount: $p=0.2395$ | Fig and Fig. legend | n/a                            | n/a |
| s9f left  | Paired t-test                  | Fig. legend | 5       | lactating female mice, Chr2         | Fig and Fig. legend | error bars are mean +/- SEM | Fig and Fig. legend | $p=0.0047$<br>$p=0.0260$                                                                                 | Fig and Fig. legend | $t(4)=5.6938$<br>$t(4)=3.4539$ | n/a |
| s9f right | Paired t-test                  | Fig. legend | 5       | Lactating female mice, Chr2         | Fig and Fig. legend | error bars are mean +/- SEM | Fig and Fig. legend | $p=0.0258$<br>$p=0.0458$                                                                                 | Fig and Fig. legend | $t(4)=3.4605$<br>$t(4)=2.8622$ | n/a |
| s10c      | One-way repeated measure ANOVA | Fig. legend | 6       | Virgin SW female mice, Chr2         | Fig and Fig. legend | error bars are mean +/- SEM | Fig and Fig. legend | $F(3, 15) = 1.12$                                                                                        | n/a                 | $p=0.3712$                     | n/a |
| s10d      | One-way repeated measure ANOVA | Fig. legend | 6       | Virgin SW female mice, Chr2         | Fig and Fig. legend | error bars are mean +/- SEM | Fig and Fig. legend | $F(3, 15) = 2.01$                                                                                        | n/a                 | $p=0.1553$                     | n/a |
| s10g      | One-way repeated measure ANOVA | Fig. legend | 5       | Lactating C57BL/6 female mice, Chr2 | Fig and Fig. legend | error bars are mean +/- SEM | Fig and Fig. legend | $F(3, 12) = 0.39$                                                                                        | n/a                 | $p=0.7644$                     | n/a |
| s10h      | One-way repeated measure ANOVA | Fig. legend | 5       | Lactating C57BL/6 female mice, Chr2 | Fig and Fig. legend | error bars are mean +/- SEM | Fig and Fig. legend | $F(3, 12) = 0.53$                                                                                        | n/a                 | $p=0.6733$                     | n/a |
| s11a      | One-way repeated measure ANOVA | Fig. legend | 22      | single units                        | Fig and Fig. legend | error bars are mean +/- SEM | Fig and Fig. legend | $F(2, 42) = 2.75$                                                                                        | n/a                 | $p = 0.0756$                   | n/a |

|            |                                          |             |                                                                                    |                                          |                     |                               |                     |                                                                                                                                                                                                                 |                     |                                                     |      |
|------------|------------------------------------------|-------------|------------------------------------------------------------------------------------|------------------------------------------|---------------------|-------------------------------|---------------------|-----------------------------------------------------------------------------------------------------------------------------------------------------------------------------------------------------------------|---------------------|-----------------------------------------------------|------|
| s11b       | One-way repeated measure ANOVA           | Fig. legend | 26                                                                                 | single units                             | Fig and Fig. legend | error bars are mean +/- SEM   | Fig and Fig. legend | F (3, 75) = 3.73                                                                                                                                                                                                | n/a                 | p = 0.0148                                          | n/a  |
| s11b       | Holm-Sidak post-hoc multiple comparisons | Fig. legend | 26                                                                                 | single units                             | Fig and Fig. legend | error bars are mean +/- SEM   | Fig and Fig. legend | p values for baseline vs. no contact: 0.415; baseline vs. investigation: 0.238; baseline vs. attack: 0.137; no contact vs. investigation: 0.358; no contact vs. attack: 0.263; investigation vs. attack: 0.332. | n/a                 | n/a                                                 | n/a  |
| s11c       | Pearson product-moment correlation       | Fig. legend | 103 each                                                                           | single units                             | Fig and Fig. legend | individual data plots         | Fig and Fig. legend | p=0.28<br>p=0.84<br>p=0.77                                                                                                                                                                                      | Fig and Fig. legend | R=-0.11<br>R=-0.020<br>R=0.029                      | Fig. |
| s11d       | Pearson product-moment correlation       | Fig. legend | 103                                                                                | single units                             | Fig and Fig. legend | individual data plots         | Fig and Fig. legend | p = 5.68 x 10 <sup>-7</sup>                                                                                                                                                                                     | Fig and Fig. legend | R=0.47                                              | Fig. |
| s11e       | Pearson product-moment correlation       | Fig. legend | 103                                                                                | single units                             | Fig and Fig. legend | individual data plots         | Fig and Fig. legend | p = 2.05 x 10 <sup>-29</sup>                                                                                                                                                                                    | Fig and Fig. legend | R=0.85                                              | Fig. |
| s12b       | Unpaired t-test                          | Fig. legend | fight, and mate animals:<br>-1.4mm: 5, 6; -1.6mm: 5, 6; -1.8mm: 7, 6; -2.0mm: 3, 3 | virgin and lactating SW female mice      | Fig and Fig. legend | mean presented by dashed line | Fig and Fig. legend | -1.4mm: p = 0.2094; -1.6mm: p = 0.0002; -1.8mm: p = 7 x 10 <sup>-5</sup> ; -2.0mm: p = 0.0010                                                                                                                   | Fig and Fig. legend | t(9)=1.3518, t(9)=6.1381, t(11)=6.1657, t(4)=8.5979 | n/a  |
| s12c       | Unpaired t-test                          | Fig. legend | fight, and mate animals:<br>-1.4mm: 3, 3; -1.6mm: 3, 3; -1.8mm: 3, 4; -2.0mm: 4, 4 | virgin and lactating C57BL/6 female mice | Fig and Fig. legend | mean presented by dashed line | Fig and Fig. legend | -1.4mm: p = 0.4211; -1.6mm: p = 0.0113; -1.8mm: p = 0.0015; -2.0mm: p = 0.0465                                                                                                                                  | Fig and Fig. legend | t(4)=0.8956, t(4)=4.4441, t(5)=6.3277, t(6)=2.5011  | n/a  |
| s12d left  | Unpaired t-test                          | Fig. legend | -1.4mm: 3, 4; -1.6mm: 3, 6; -1.8mm: 4, 6; -2.0mm: 3, 6                             | virgin SW female mice                    | Fig and Fig. legend | error bars are mean +/- SEM   | Fig and Fig. legend | -1.4mm: p = 0.0003; -1.6mm: p = 0.0228; -1.8mm: p = 0.0020; -2.0mm: p = 0.0118                                                                                                                                  | Fig and Fig. legend | t(5)=8.7001, t(7)=2.9055, t(8)=4.5061, t(7)=3.3793  | n/a  |
| s12d right | Unpaired t-test                          | Fig. legend | -1.4mm: 3, 5; -1.6mm: 3, 5; -1.8mm: 3, 7; -2.0mm: 3, 4                             | lactating SW female mice                 | Fig and Fig. legend | error bars are mean +/- SEM   | Fig and Fig. legend | -1.4mm: p = 0.0088; -1.6mm: p = 0.0001; -1.8mm: p = 0.0079; -2.0mm: p = 0.0078                                                                                                                                  | Fig and Fig. legend | t(6)=3.8136, t(6)=8.5879, t(8)=3.5168, t(5)=4.2898  | n/a  |

|            |                 |             |                                                                                    |                          |                     |                               |                     |                                                                                           |                     |                                                                        |     |
|------------|-----------------|-------------|------------------------------------------------------------------------------------|--------------------------|---------------------|-------------------------------|---------------------|-------------------------------------------------------------------------------------------|---------------------|------------------------------------------------------------------------|-----|
| s12e left  | Paired t-test   | Fig. legend | 4                                                                                  | virgin SW female mice    | Fig and Fig. legend | error bars are mean +/- SEM   | Fig and Fig. legend | $p = 0.8645$                                                                              | Fig and Fig. legend | $t(3)=0.1858$                                                          | n/a |
| s12d right | Paired t-test   | Fig. legend | 3                                                                                  | lactating SW female mice | Fig and Fig. legend | error bars are mean +/- SEM   | Fig and Fig. legend | $p = 0.0359$                                                                              | Fig and Fig. legend | $t(2)=5.1351$                                                          | n/a |
| s15d       | Unpaired t-test | Fig. legend | fight, and mate animals:<br>-1.4mm: 4, 3; -1.6mm: 4, 3; -1.8mm: 4, 3; -2.0mm: 3, 3 | male mice                | Fig and Fig. legend | mean presented by dashed line | Fig and Fig. legend | -1.4mm: $p = 0.2085$ ; -1.6mm: $p = 0.8239$ ; -1.8mm: $p = 0.1345$ ; -2.0mm: $p = 0.9449$ | Fig and Fig. legend | $t(5)=1.4433$ ,<br>$t(5)=0.2345$ ,<br>$t(5)=1.7838$ ,<br>$t(4)=0.0735$ | n/a |

## Supplementary Note 1

To determine whether the c-Fos activation in the VMHvl observed after fighting (**Fig. 1**) is functionally relevant, we suppressed the VMHvl activity in lactating SW mice. We injected an AAV expressing hM4Di-mCherry or control fluorophore mcherry bilaterally into the VMHvl of virgin female mice (**Supplementary Fig. 2a-b**) and one week after viral injection, we paired each female with an adult male mouse until midterm pregnancy. Between postpartum day 2 to 7, we injected saline and clozapine-N-oxide (CNO, the engineered ligand of hM4Di) intraperitoneally on interleaved days (**Supplementary Fig.2c**). We confirmed that CNO application significantly reduced the spiking activity of hM4Di-mCherry expressing VMHvl cells using *in vitro* slice recording (**Supplementary Fig. 2d**). Thirty minutes after injection, we introduced a male intruder into the home cage of the test animal for 10 min and assessed aggression. On saline injected days, females attacked the intruder immediately and repeatedly (Latency (Mean  $\pm$  STD):  $4.2 \pm 0.86$  s; episodes:  $33.3 \pm 2.3$ ; duration:  $37.0 \pm 7.3$  s, N = 8 animals). After CNO injection, both the number and duration of attacks were significantly reduced (episodes:  $18.0 \pm 3.1$ , duration:  $16.1 \pm 4.4$  s) although the latency to first attack ( $4.0 \pm 0.71$  s) did not change (**Supplementary Fig. 2e-h**). Neither the duration of investigation of the male nor the latency to retrieve pups changed after CNO injection, suggesting that the manipulation did not affect locomotion or social behaviors in general (**Supplementary Fig. 2i-j**). Post hoc histological analysis revealed that the level of aggression suppression was significantly correlated with the number of hM4Di-mCherry expressing cells in the posterior VMHvl but not the anterior VMHvl or ARC (**Supplementary Fig. 2k**).
